# Supplementary material for: Evolutionary Consequences of DNA Methylation in a Basal Metazoan
Source: PubMed Central journal article supplement — Mol Biol Evol. 2016 May 14;33(9):2285–93. doi: 10.1093/molbev/msw100 (PMC4989105; doi:10.1093/molbev/msw100), 2016-05-14
Supplement: supp_msw100_Supplemental_Material.pdf [file supp_msw100_Supplemental_Material.pdf]

## Supplementary Material

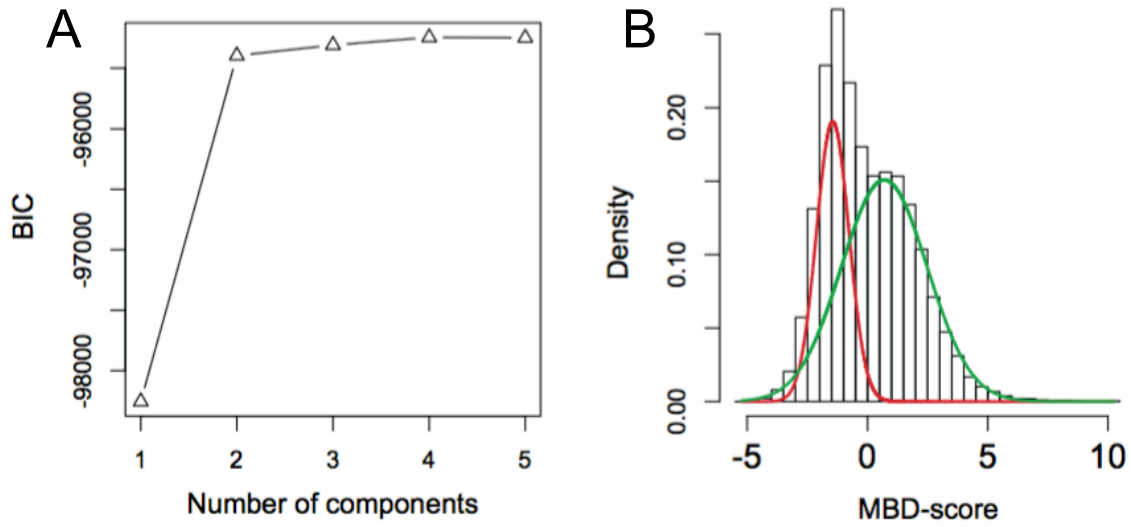

Figure S1: Fitting of Gaussian mixture components to distribution of MBD-scores. (A) Plot of Bayesian Information Criteria for models of the distribution of MBD-scores using different numbers of Gaussian components. (B) Traces of the two-component model overlaid on the distribution.

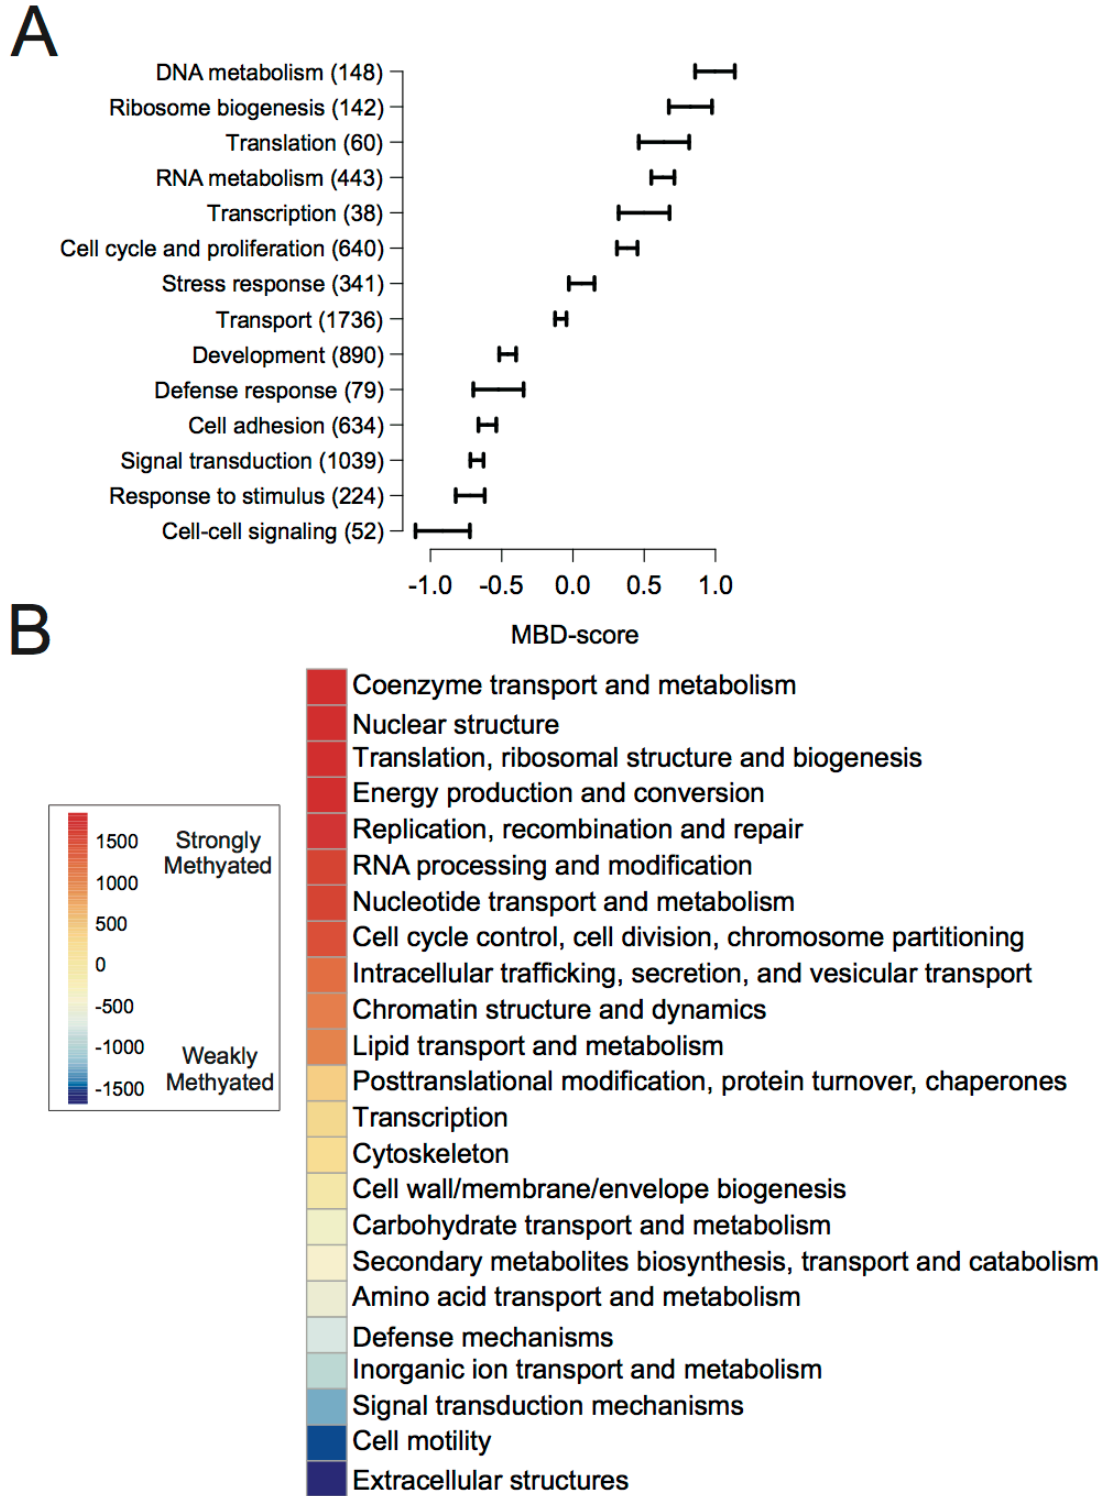

Figure S2: Relationship between gene functional categories and MBD-score. (A) Mean MBD-score for a selected set of Gene Ontology (GO) terms for biological processes. Error bars indicate standard error. (B) Enrichment of KOG terms based on Mann-Whitney U tests implemented in the R package KOGMWU as in Dixon et al. (2015).

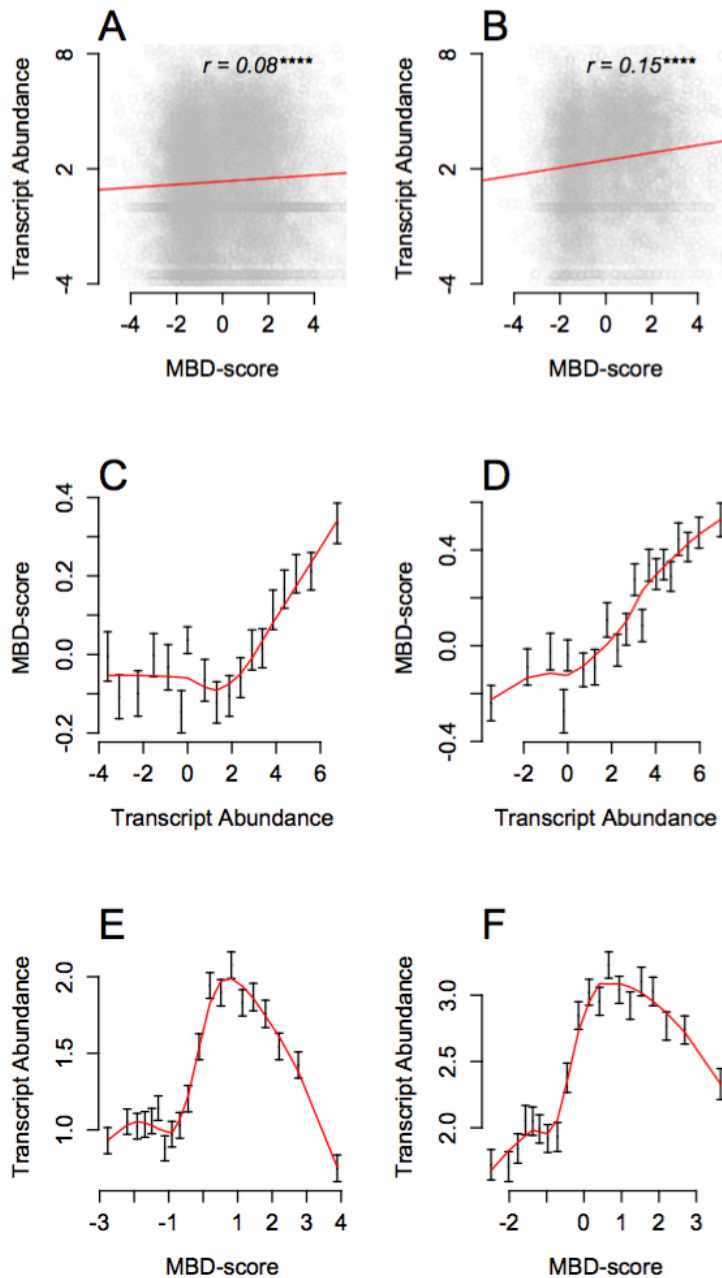

Figure S3: Relationships between transcript abundance and MBD-score. Figures are paired to illustrate interrelationship with gene length. Left panels show relationships for all coding sequences, right panels for coding sequences longer than 800 bp. (A-B) Correlation between MBD-score and normalized transcript abundance. Correlation is given as Spearman's Rho ( $r$ ). Asterisks denote significance based on Spearman's rank tests. Red line traces least squared linear regression. (C-D) Highly expressed genes tend to be strongly methylated. Mean MBD-score was plotted for 12 quantiles of genes ranked by transcript abundance. Error bars indicate standard error. (E-F) MBD-score generally predicts higher expression, but the most strongly methylated genes show lower expression. This effect is especially true for shorter genes, an effect also described in *Arabidopsis* (Zilberman et al. 2007). Significance notation: ns > 0.05; \* < 0.05; \*\* < 0.01; \*\*\* < 0.001; \*\*\*\* < 0.0001.

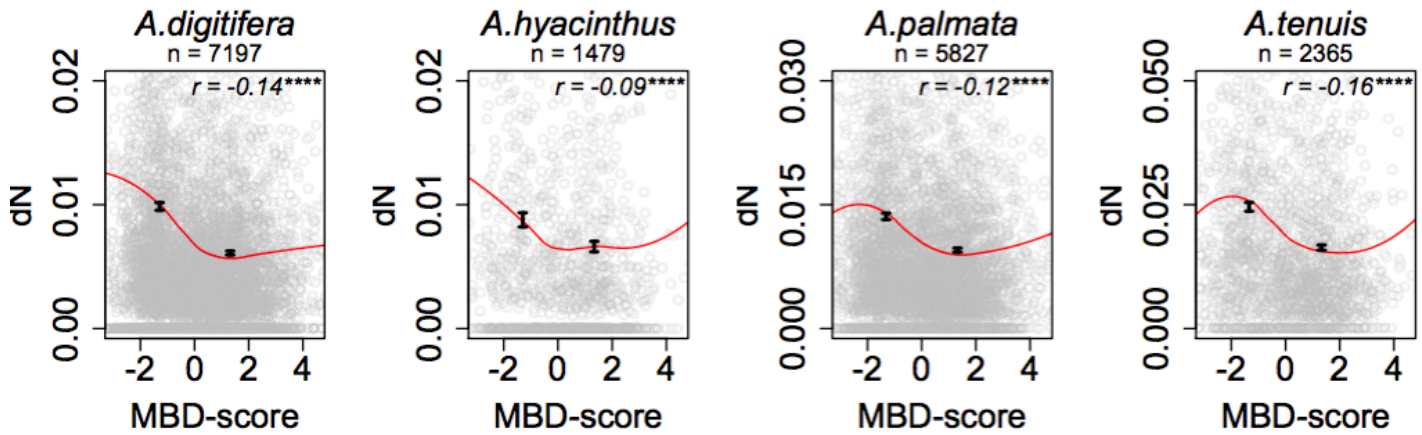

Figure S4: Relationship between MBD-score and pairwise dN between *A. millepora* and other *Acropora* species. Genes were divided into 20 quantiles based on MBD-score. Error bars show mean and standard error for the weakly methylated and strongly methylated genes. The number of orthologs (n) is given at the top of each panel. Asterisks indicate significance based on Spearman's rho (r). Red lines are smoothed traces of the relationship across all points.

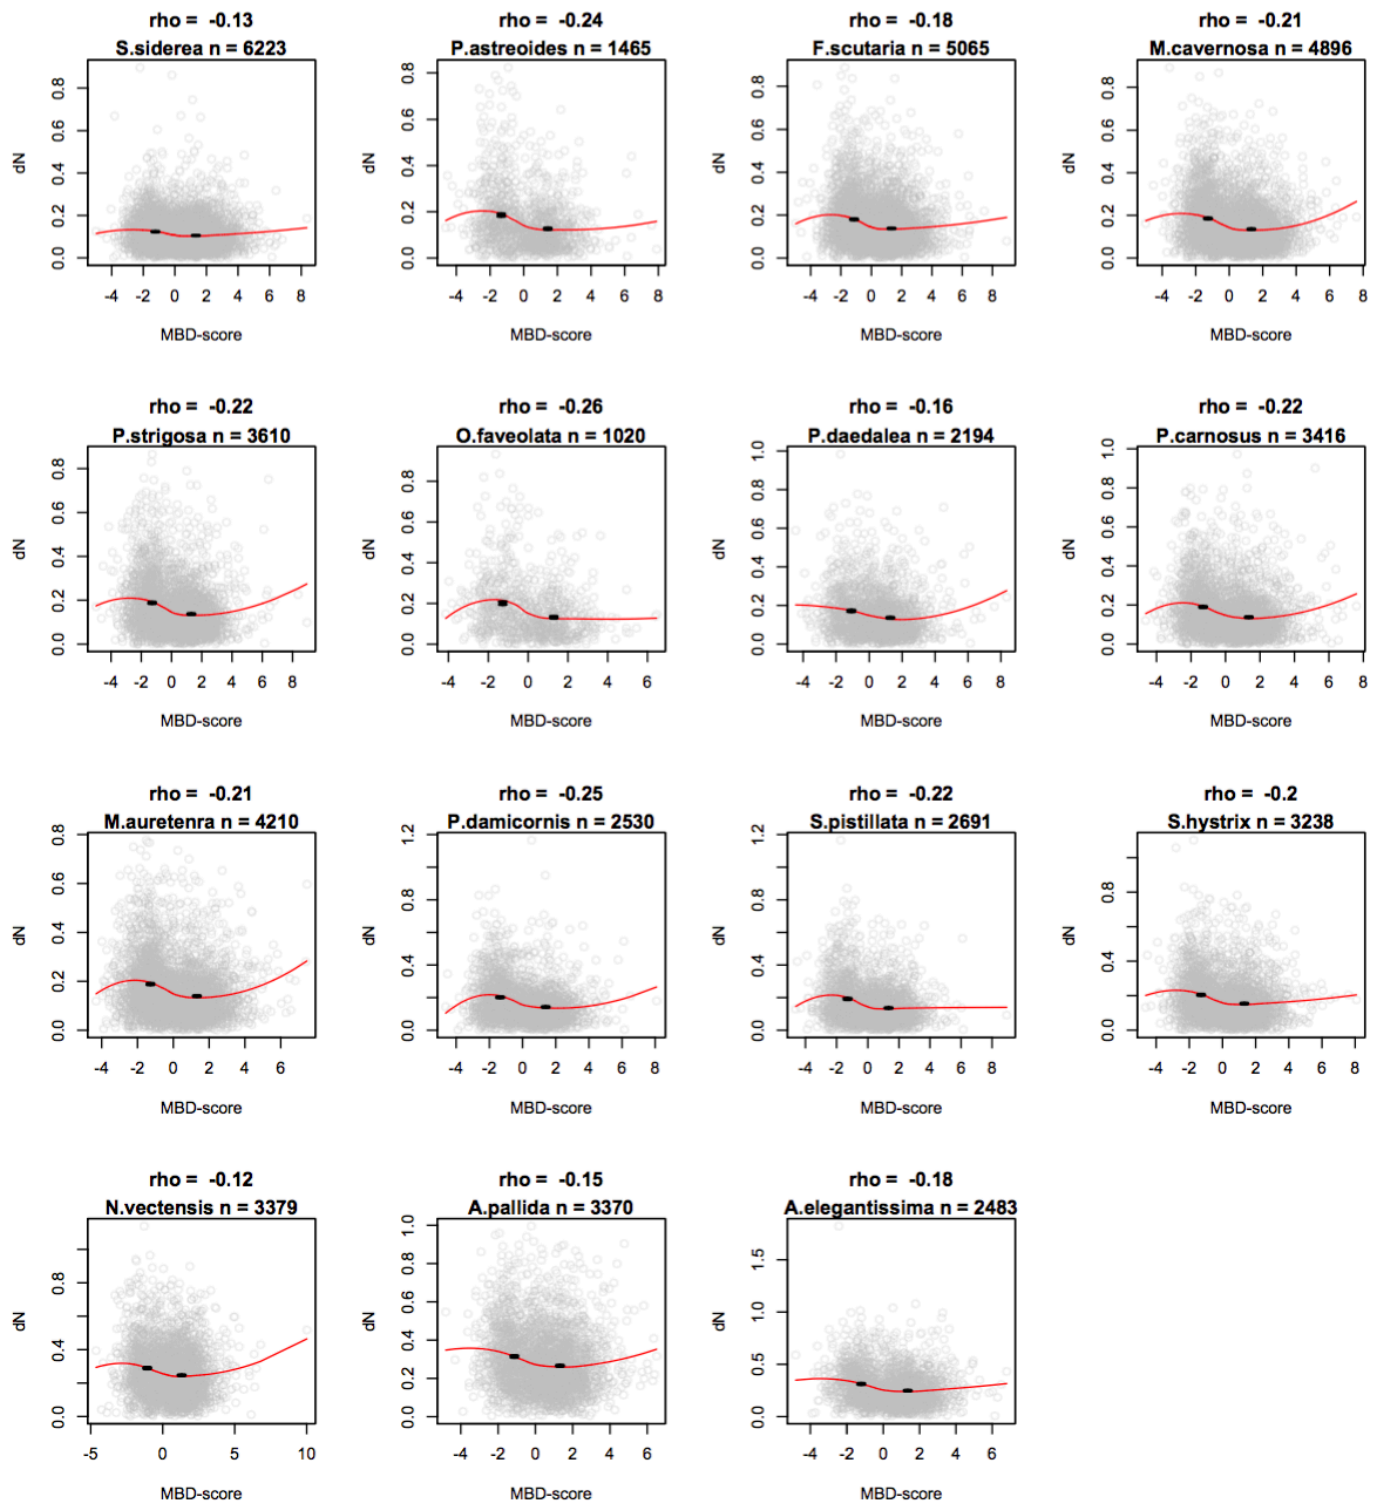

Figure S5: Relationship between nonsynonymous substitution rate (dN) and MBD-score across all species outside of *Acropora*. The two error bars in each panel display mean dN and standard error for the strongly methylated (MBD-score  $\geq 0$ ) and weakly methylated (MBD-score  $< 0$ ) genes. Correlations are given as Spearman's Rho. All p values for Spearman's rank correlation test were  $< 0.0001$ . Red lines are smoothed traces with a span of 0.8.

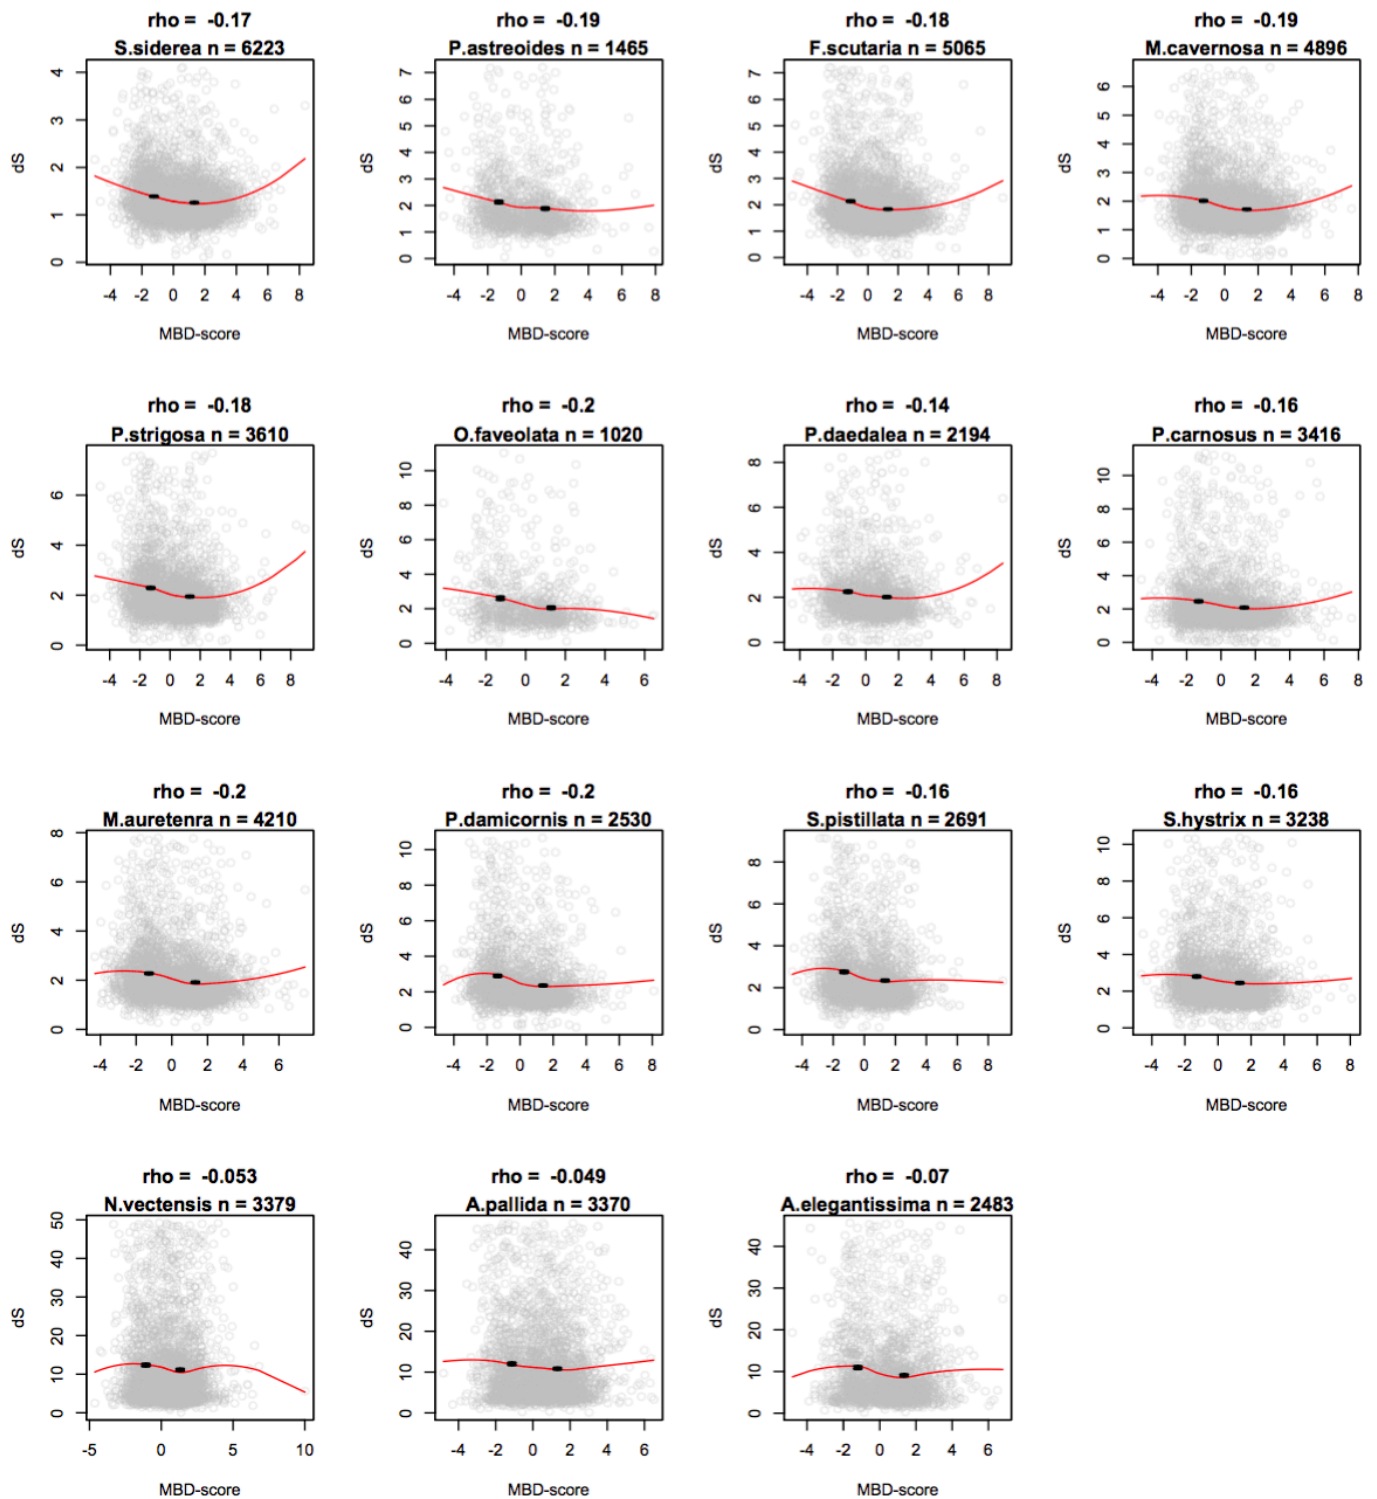

Figure S6: Relationship between synonymous substitution rate (dS) and MBD-score across all species outside of *Acropora*. The two error bars in each figure display mean dS and standard error for the strongly methylated (MBD-score  $\geq 0$ ) and weakly methylated (MBD-score  $< 0$ ) genes. Correlation is given as Spearman's Rho. All p values for Spearman's rank correlation test were  $< 0.0001$ . Red lines are smoothed traces with a span of 0.8.

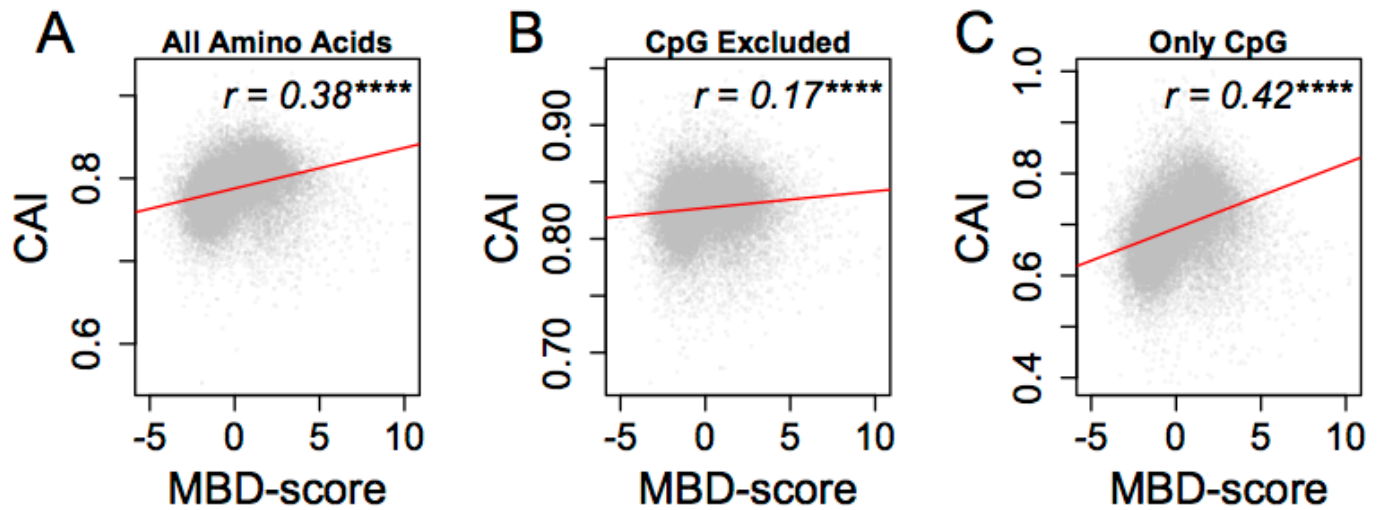

Figure S7: Correlation between codon adaptation index (CAI) and MBD-score with and without amino acids coded for by codons with CpG dinucleotides (Serine, Proline, Threonine, Alanine and Arginine). (A) Correlation between CAI and MBD-score with all amino acids included. (B) Calculating CAI with Serine, Proline, Threonine, Alanine and Arginine severely reduces correlation. (C) Calculating CAI based solely on Serine, Proline, Threonine, Alanine and Arginine increases strengthens correlation. Asterisks indicate significance based on Spearman's rank tests. Red lines trace least squared regression.



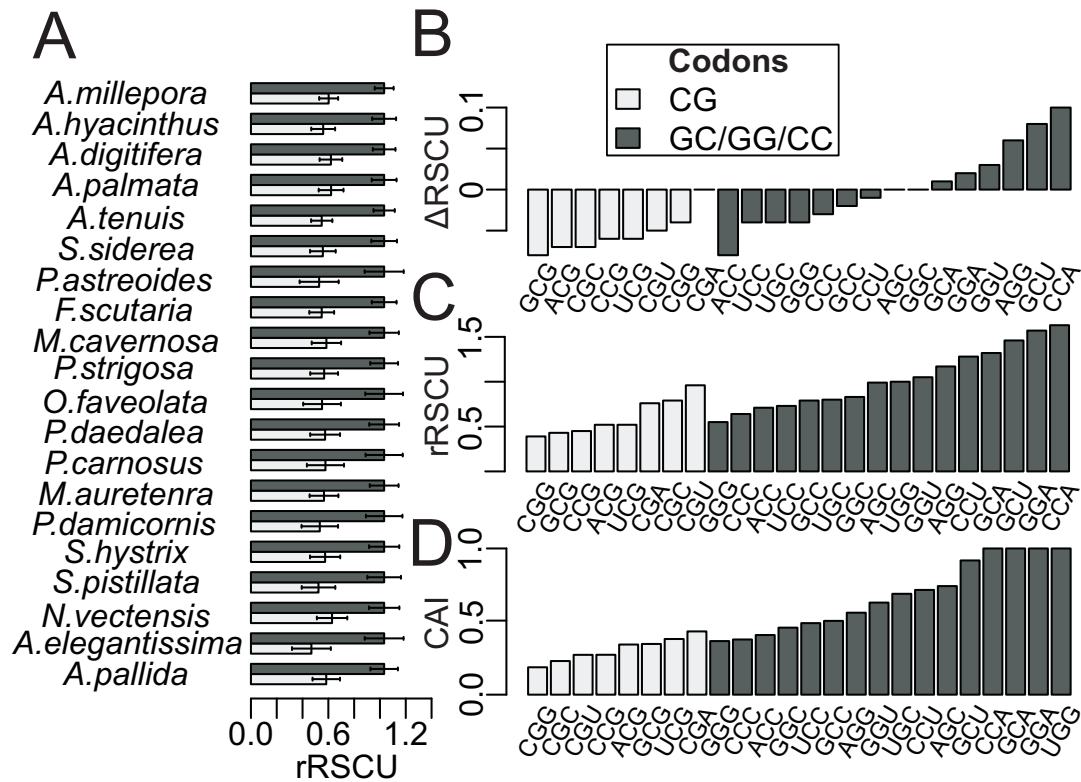

Figure S8: Codons bearing CpG dinucleotides are underrepresented in highly expressed genes. A) Comparison of mean Relative Synonymous Codon Usage for CG bearing codons compared to all other codons bearing GC, GG, or CC dinucleotides in ribosomal genes. Error bars show standard error. A value of 1 for this metric indicates no bias. B) Comparison of  $\Delta$ RSCU for codons bearing CG, GC, GG or CC dinucleotides in *A. millepora*.  $\Delta$ RSCU is the difference in RSCU between the top 5% most highly expressed genes and bottom 5%. Negative values indicate underrepresentation in highly expressed genes. C) Comparison of RSCU for CG, GC, GG, or CC codons in ribosomal genes from *A. millepora*. Values less than one indicate underrepresentation in ribosomal genes. D) Comparison of relative adaptiveness ( $W$ ) for CG, GC, GG, or CC codons in *A. millepora*. Here a value of 1 indicates that the codon is optimal for its amino acid. No CpG codons were optimal, and were all less than half as frequent as the optimal codon.

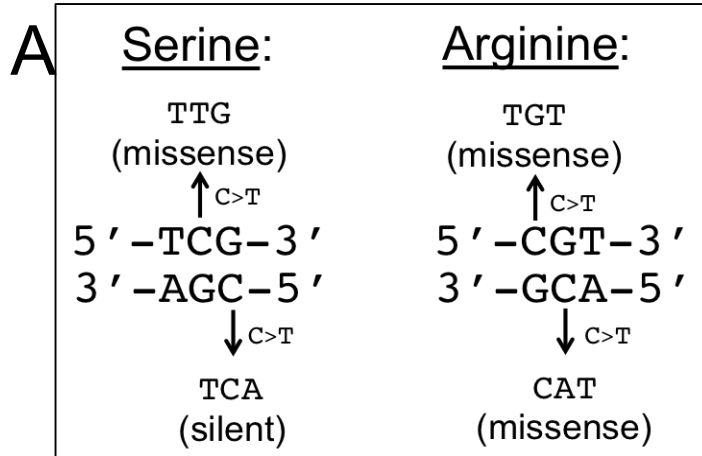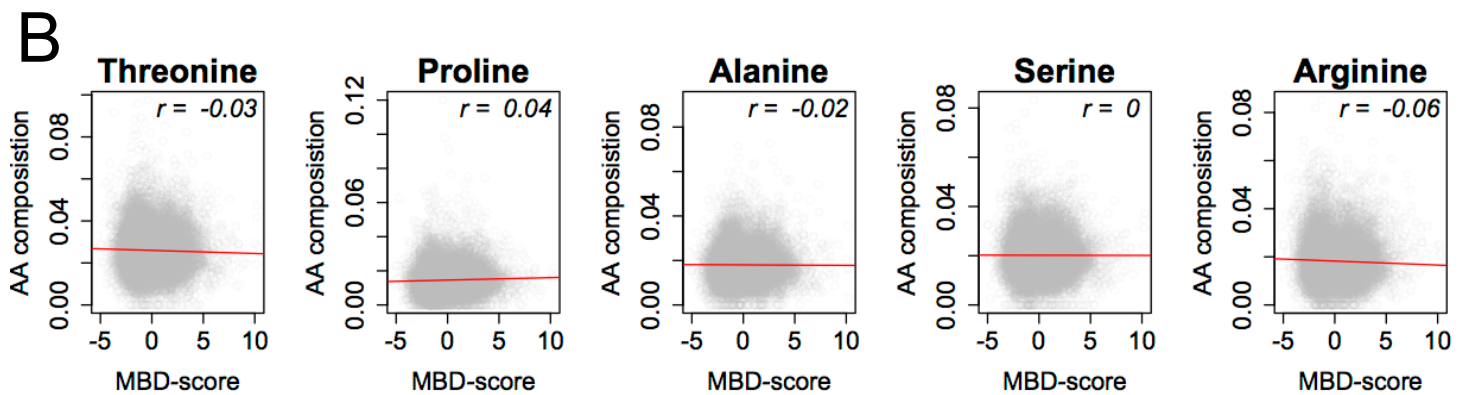

Figure S9: Loss of CpG bearing codons occurs through silent C>T substitution on the antisense stand. Methylated cytosines tend to be substituted for thymine (Shen et al. 1994). (A) On the sense strand, 5mC>T substitutions result in amino acid changes, whereas 5mC>T substitutions on the antisense strand are silent. (B) MBD-score shows little correlation with amino acid content, indicating that purifying selection counteracts most nonsynonymous 5mC>T substitutions. Although the correlation is weak, arginine content shows a stronger negative correlation than of the other amino acid. This is consistent with the fact for CGN codons, 5mC>T substitutions on either strand will replace the arginine.

Table S1: Optimal codons identified based on correspondence analysis of codon usage implemented in CodonW.  $X^2$  indicates the chi-square statistic describing the enrichment of the synonymous codons (see supplemental methods below). All NCA codons were identified as optimal and tended toward higher  $X^2$ . No NCG codons were optimal.

| <b>codon</b> | <b>amino acid</b> | <b><math>X^2</math></b> |
|--------------|-------------------|-------------------------|
| AGA          | Arg               | 562.906                 |
| UUU          | Phe               | 389.064                 |
| ACA          | Thr               | 309.689                 |
| GCA          | Ala               | 286.519                 |
| AGG          | Arg               | 277.184                 |
| UCA          | Ser               | 188.606                 |
| AAU          | Asn               | 143.76                  |
| AGU          | Ser               | 132.991                 |
| CCA          | Pro               | 132.423                 |
| UAU          | Tyr               | 111.065                 |
| AUA          | Ile               | 95.299                  |
| GAU          | Asp               | 91.223                  |
| CAU          | His               | 85.921                  |
| UGU          | Cys               | 59.489                  |
| UUA          | Leu               | 49.41                   |
| GGA          | Gly               | 48.125                  |
| AUU          | Ile               | 37.656                  |
| GUG          | Val               | 31.472                  |
| CUA          | Leu               | 27.806                  |
| CUG          | Leu               | 19.063                  |
| GGG          | Gly               | 18.105                  |
| GUA          | Val               | 17.354                  |
| AAG          | Lys               | 8.718                   |
| GAA          | Glu               | 4.369                   |

Table S2: Relative adaptiveness of codons in *Acropora millepora* (see supplemental methods below). NCA codons are highlighted in green and tend to have values equal to close to the maximum of 1.00. NCG codons are highlighted in red and always have the lowest relative adaptiveness value for their respective amino acids.

| codon | amino acid | wi   | rscu | codon | amino acid | wi   | rscu |
|-------|------------|------|------|-------|------------|------|------|
| GCU   | Ala        | 1.00 | 1.39 | UUG   | Leu        | 1.00 | 1.45 |
| GCA   | Ala        | 0.96 | 1.33 | CUU   | Leu        | 0.97 | 1.40 |
| GCC   | Ala        | 0.58 | 0.80 | CUG   | Leu        | 0.79 | 1.15 |
| GCG   | Ala        | 0.34 | 0.47 | UUA   | Leu        | 0.57 | 0.82 |
| AGA   | Arg        | 1.00 | 1.98 | CUC   | Leu        | 0.48 | 0.69 |
| AGG   | Arg        | 0.57 | 1.13 | CUA   | Leu        | 0.34 | 0.50 |
| CGA   | Arg        | 0.48 | 0.96 | AAA   | Lys        | 1.00 | 1.09 |
| CGU   | Arg        | 0.41 | 0.82 | AAG   | Lys        | 0.83 | 0.91 |
| CGC   | Arg        | 0.34 | 0.67 | AUG   | Met        | 1.00 | 1.00 |
| CGG   | Arg        | 0.22 | 0.44 | UUU   | Phe        | 1.00 | 1.22 |
| AAU   | Asn        | 1.00 | 1.09 | UUC   | Phe        | 0.64 | 0.78 |
| AAC   | Asn        | 0.83 | 0.91 | CCA   | Pro        | 1.00 | 1.63 |
| GAU   | Asp        | 1.00 | 1.21 | CCU   | Pro        | 0.78 | 1.27 |
| GAC   | Asp        | 0.65 | 0.79 | CCC   | Pro        | 0.39 | 0.64 |
| UGU   | Cys        | 1.00 | 1.14 | CCG   | Pro        | 0.28 | 0.46 |
| UGC   | Cys        | 0.75 | 0.86 | UCA   | Ser        | 1.00 | 1.36 |
| CAA   | Gln        | 1.00 | 1.06 | AGU   | Ser        | 0.88 | 1.20 |
| CAG   | Gln        | 0.89 | 0.94 | UCU   | Ser        | 0.88 | 1.20 |
| GAA   | Glu        | 1.00 | 1.21 | AGC   | Ser        | 0.70 | 0.95 |
| GAG   | Glu        | 0.65 | 0.79 | UCC   | Ser        | 0.56 | 0.76 |
| GGA   | Gly        | 1.00 | 1.56 | UCG   | Ser        | 0.39 | 0.53 |
| GGU   | Gly        | 0.71 | 1.11 | ACA   | Thr        | 1.00 | 1.53 |
| GGC   | Gly        | 0.52 | 0.81 | ACU   | Thr        | 0.78 | 1.19 |
| GGG   | Gly        | 0.34 | 0.53 | ACC   | Thr        | 0.49 | 0.75 |
| CAU   | His        | 1.00 | 1.14 | ACG   | Thr        | 0.35 | 0.53 |
| CAC   | His        | 0.75 | 0.86 | UGG   | Trp        | 1.00 | 1.00 |
| AUU   | Ile        | 1.00 | 1.4  | UAU   | Tyr        | 1.00 | 1.02 |
| AUC   | Ile        | 0.67 | 0.94 | UAC   | Tyr        | 0.96 | 0.98 |
| AUA   | Ile        | 0.48 | 0.67 | GUU   | Val        | 1.00 | 1.37 |
|       |            |      |      | GUG   | Val        | 0.89 | 1.22 |
|       |            |      |      | GUC   | Val        | 0.57 | 0.78 |
|       |            |      |      | GUA   | Val        | 0.47 | 0.64 |



Table S4: Anthozoan species with publicly available reference transcriptomes used in this study.

| Order        | Family         | Genus                 | Species              | Citation                | URL                                                                                                                                       |
|--------------|----------------|-----------------------|----------------------|-------------------------|-------------------------------------------------------------------------------------------------------------------------------------------|
| Actiniaria   | Actiniidae     | <i>Anthopleura</i>    | <i>elegantissima</i> | Kitchen et al. 2015     | <a href="http://people.oregonstate.edu/~meyere/data.html">http://people.oregonstate.edu/~meyere/data.html</a>                             |
| Actiniaria   | Aiptasiidae    | <i>Aiptasia</i>       | <i>pallida</i>       | Sunagawa et al. 2009    | <a href="http://pringlelab.stanford.edu/projects.html">http://pringlelab.stanford.edu/projects.html</a>                                   |
| Actiniaria   | Edwardsiidae   | <i>Nematostella</i>   | <i>vectensis</i>     | Nordberg et al. 2014    | <a href="http://genome.jgi-psf.org/Nemve1/Nemve1.download.ftp.html">http://genome.jgi-psf.org/Nemve1/Nemve1.download.ftp.html</a>         |
| Scleractinia | Acroporidae    | <i>Acropora</i>       | <i>palmata</i>       | Polato et al. 2011      | <a href="http://www.personal.psu.edu/ibb3/Research.htm#Data">http://www.personal.psu.edu/ibb3/Research.htm#Data</a>                       |
| Scleractinia | Acroporidae    | <i>Acropora</i>       | <i>hyacinthus</i>    | Willette et al. 2014    | <a href="http://www.bio.utexas.edu/research/matz_lab/matzlab/Data.html">http://www.bio.utexas.edu/research/matz_lab/matzlab/Data.html</a> |
| Scleractinia | Acroporidae    | <i>Acropora</i>       | <i>tenuis</i>        | none                    | <a href="http://www.bio.utexas.edu/research/matz_lab/matzlab/Data.html">http://www.bio.utexas.edu/research/matz_lab/matzlab/Data.html</a> |
| Scleractinia | Acroporidae    | <i>Acropora</i>       | <i>millepora</i>     | Moya et al. 2012        | <a href="http://www.bio.utexas.edu/research/matz_lab/matzlab/Data.html">http://www.bio.utexas.edu/research/matz_lab/matzlab/Data.html</a> |
| Scleractinia | Acroporidae    | <i>Acropora</i>       | <i>digitifera</i>    | Shinzato et al. 2011    | <a href="http://marinegenomics.oist.jp/genomes/downloads?project_id=3">http://marinegenomics.oist.jp/genomes/downloads?project_id=3</a>   |
| Scleractinia | Astocoeniidae  | <i>Madracis</i>       | <i>auretenra</i>     | none                    | <a href="http://people.oregonstate.edu/~meyere/data.html">http://people.oregonstate.edu/~meyere/data.html</a>                             |
| Scleractinia | Montastraeidae | <i>Montastraea</i>    | <i>cavernosa</i>     | Kitchen et al. 2015     | <a href="http://people.oregonstate.edu/~meyere/data.html">http://people.oregonstate.edu/~meyere/data.html</a>                             |
| Scleractinia | Faviidae       | <i>Platygyra</i>      | <i>carnosus</i>      | Sun et al. 2013         | <a href="http://www.comp.hkbu.edu.hk/~db/PcarnBase/">http://www.comp.hkbu.edu.hk/~db/PcarnBase/</a>                                       |
| Scleractinia | Faviidae       | <i>Platygyra</i>      | <i>daedalea</i>      | none                    | <a href="http://people.oregonstate.edu/~meyere/data.html">http://people.oregonstate.edu/~meyere/data.html</a>                             |
| Scleractinia | Fungiidae      | <i>Fungia</i>         | <i>scutaria</i>      | Kitchen et al. 2015     | <a href="http://people.oregonstate.edu/~meyere/data.html">http://people.oregonstate.edu/~meyere/data.html</a>                             |
| Scleractinia | Merulinidae    | <i>Orbicella</i>      | <i>faveolata</i>     | Schwarz et al. 2008     | <a href="http://www.compagen.org/">http://www.compagen.org/</a>                                                                           |
| Scleractinia | Mussidae       | <i>Pseudodiploria</i> | <i>strigosa</i>      | none                    | <a href="http://people.oregonstate.edu/~meyere/data.html">http://people.oregonstate.edu/~meyere/data.html</a>                             |
| Scleractinia | Pocilloporidae | <i>Pocillopora</i>    | <i>damicornis</i>    | Lubinski & Granger 2013 | <a href="http://cnidarians.bu.edu/PocilloporaBase/cgi-bin/pdamdata.cgi">http://cnidarians.bu.edu/PocilloporaBase/cgi-bin/pdamdata.cgi</a> |
| Scleractinia | Pocilloporidae | <i>Seriatopora</i>    | <i>hystrix</i>       | Kitchen et al. 2015     | <a href="http://people.oregonstate.edu/~meyere/data.html">http://people.oregonstate.edu/~meyere/data.html</a>                             |
| Scleractinia | Pocilloporidae | <i>Stylophora</i>     | <i>pistillata</i>    | Maor-Landaw et al. 2014 | <a href="http://data.centrescientifique.mc/Data/">http://data.centrescientifique.mc/Data/</a>                                             |
| Scleractinia | Poritidae      | <i>Porites</i>        | <i>astreoides</i>    | Kenkel et al. 2013      | <a href="http://www.bio.utexas.edu/research/matz_lab/matzlab/Data.html">http://www.bio.utexas.edu/research/matz_lab/matzlab/Data.html</a> |
| Scleractinia | Siderastreidae | <i>Siderastrea</i>    | <i>siderea</i>       | Davies et al. 2015      | <a href="https://sarahwdavies.wordpress.com/data/">https://sarahwdavies.wordpress.com/data/</a>                                           |

\*See main text for full citations

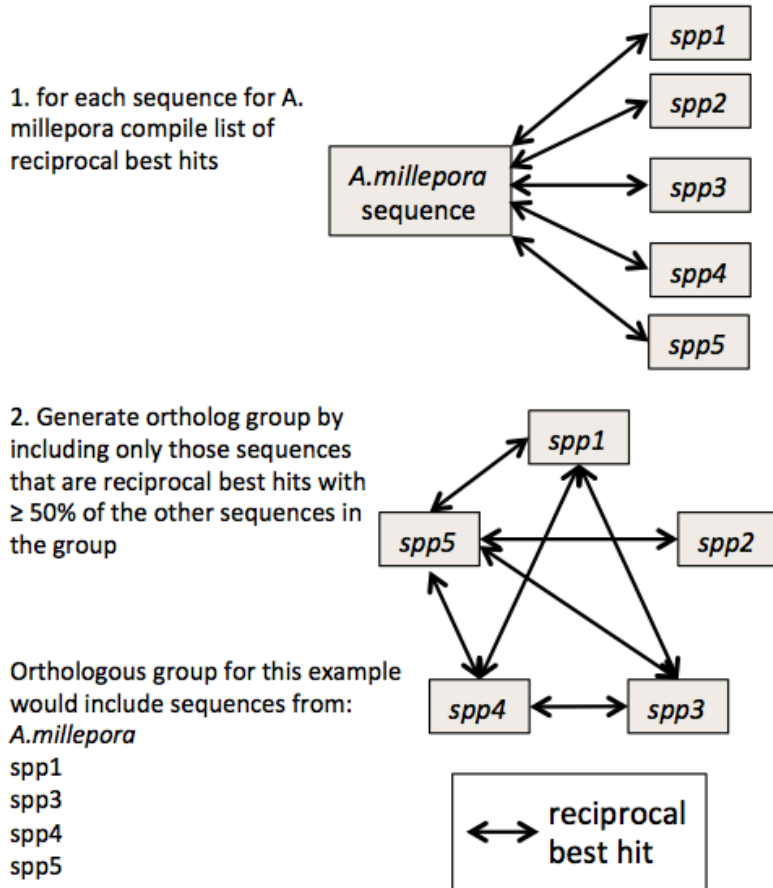

Figure S10: Schematic representation of ortholog assignment method. Sequences from *A. millepora* were used as anchors. For each sequence, reciprocal best hits from each other species were assembled as candidate orthologs. This group of candidates was then subset by iteratively removing sequences that were reciprocal best hits with  $< 50\%$  of other sequences within the group.

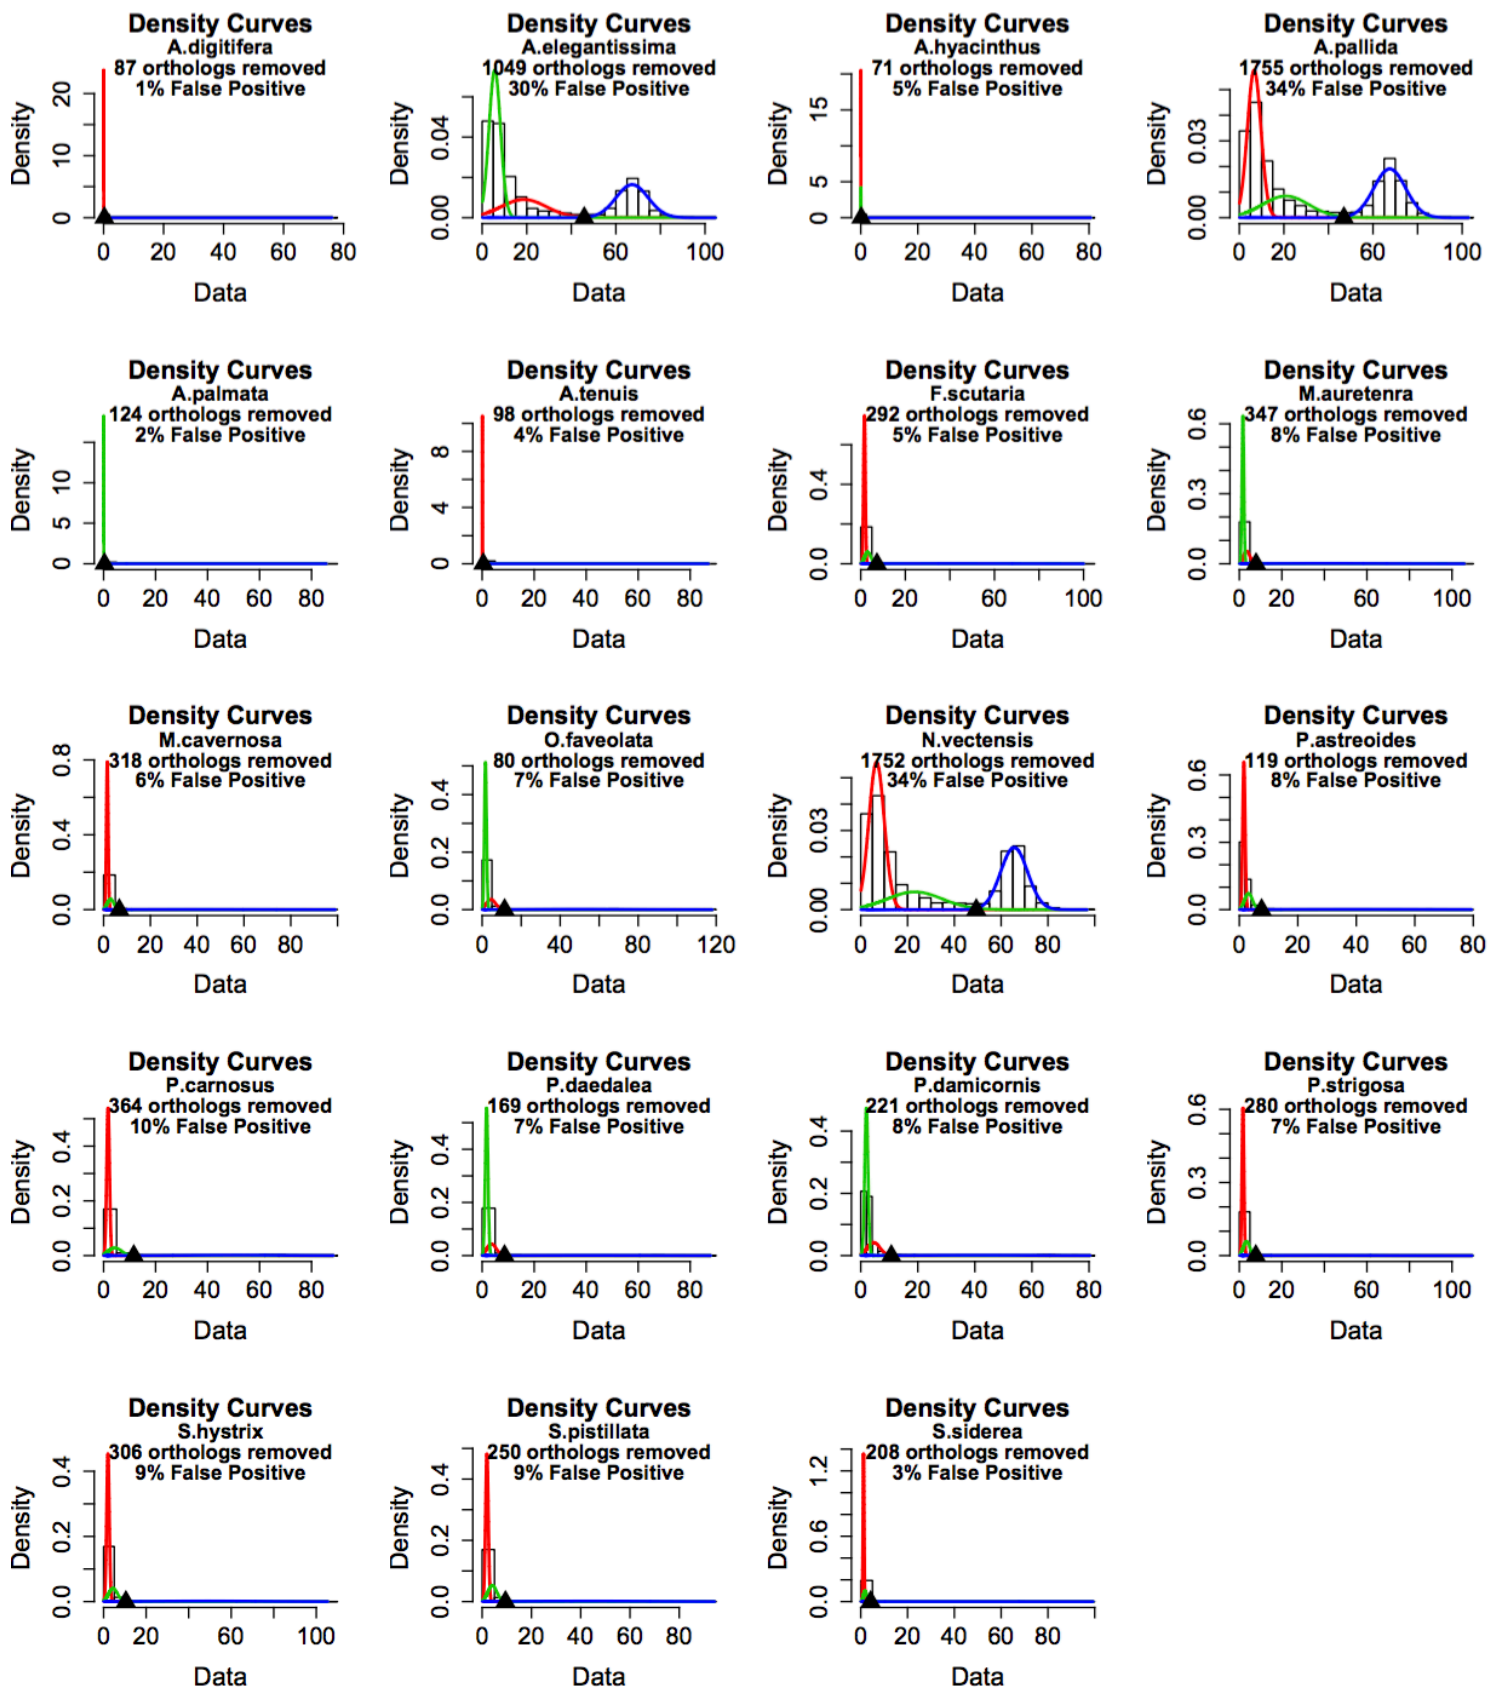

Figure S11: Identification and removal of false-positive ortholog calls. A three component Gaussian mixture model was fitted to the pairwise dS estimates with *A. millepora* for each species. The third component (blue above) was assumed to represent false positives. These orthologs (to the right of the black triangle) were removed from further analysis. The number and percentage of false positives removed is given in the title for each figure. The three anemone species, (*A. elegantissima*, *A. pallida*, and *N. vectensis*) displayed much greater rates of false positives.
